# Supplementary material for: Sulfur dioxide (SO 2 ) from MIPAS in the upper troposphere and lower stratosphere 2002–2012
Source: Copernicus journal article supplement (doi:10.5194/acp-15-7017-2015), 2015-06-29
Supplement: Supplementary file 1 [file acp-15-7017-2015-supplement.pdf]

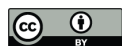

*Supplement of*

## **Sulfur dioxide (SO<sub>2</sub>) from MIPAS in the upper troposphere and lower stratosphere 2002–2012**

**M. Höpfner et al.**

*Correspondence to:* M. Höpfner ([michael.hoepfner@kit.edu](mailto:michael.hoepfner@kit.edu))

The copyright of individual parts of the supplement might differ from the CC-BY 3.0 licence.

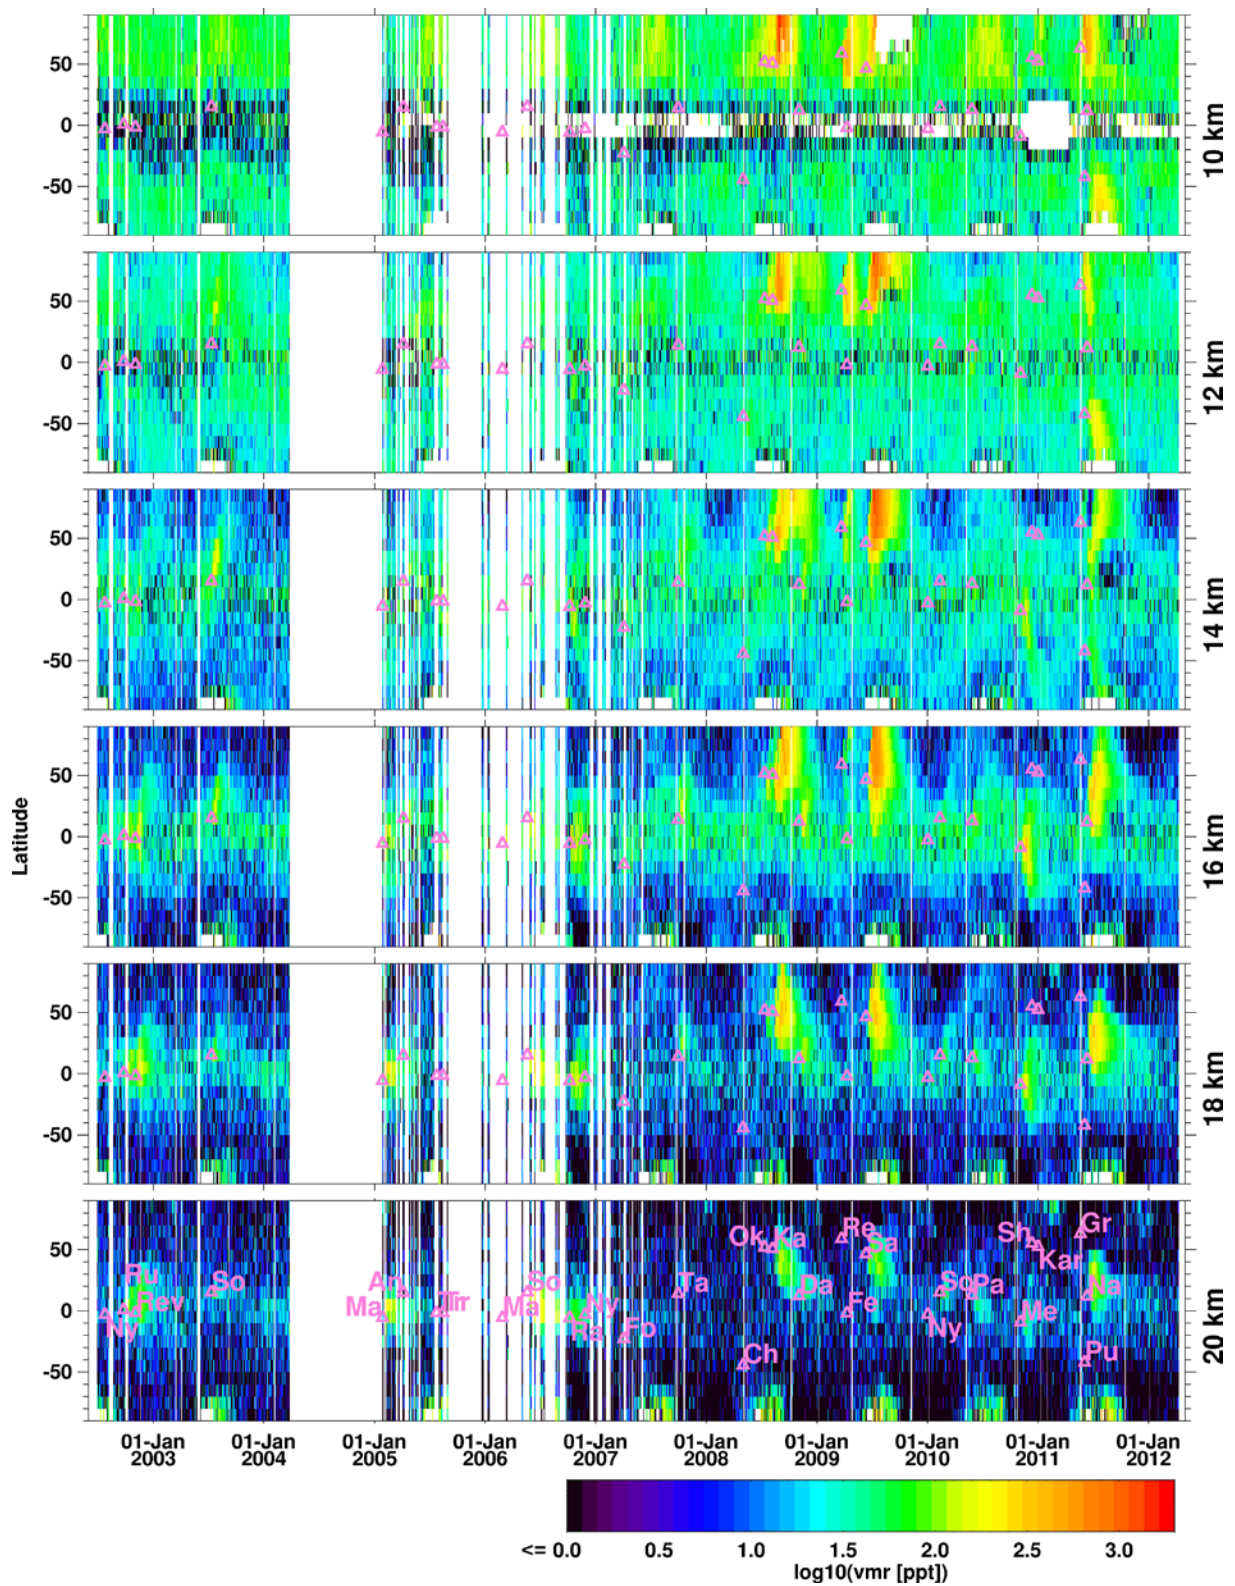

**Fig. 1.** Same as Fig. 10 of the paper but with a logarithmic colour scale.

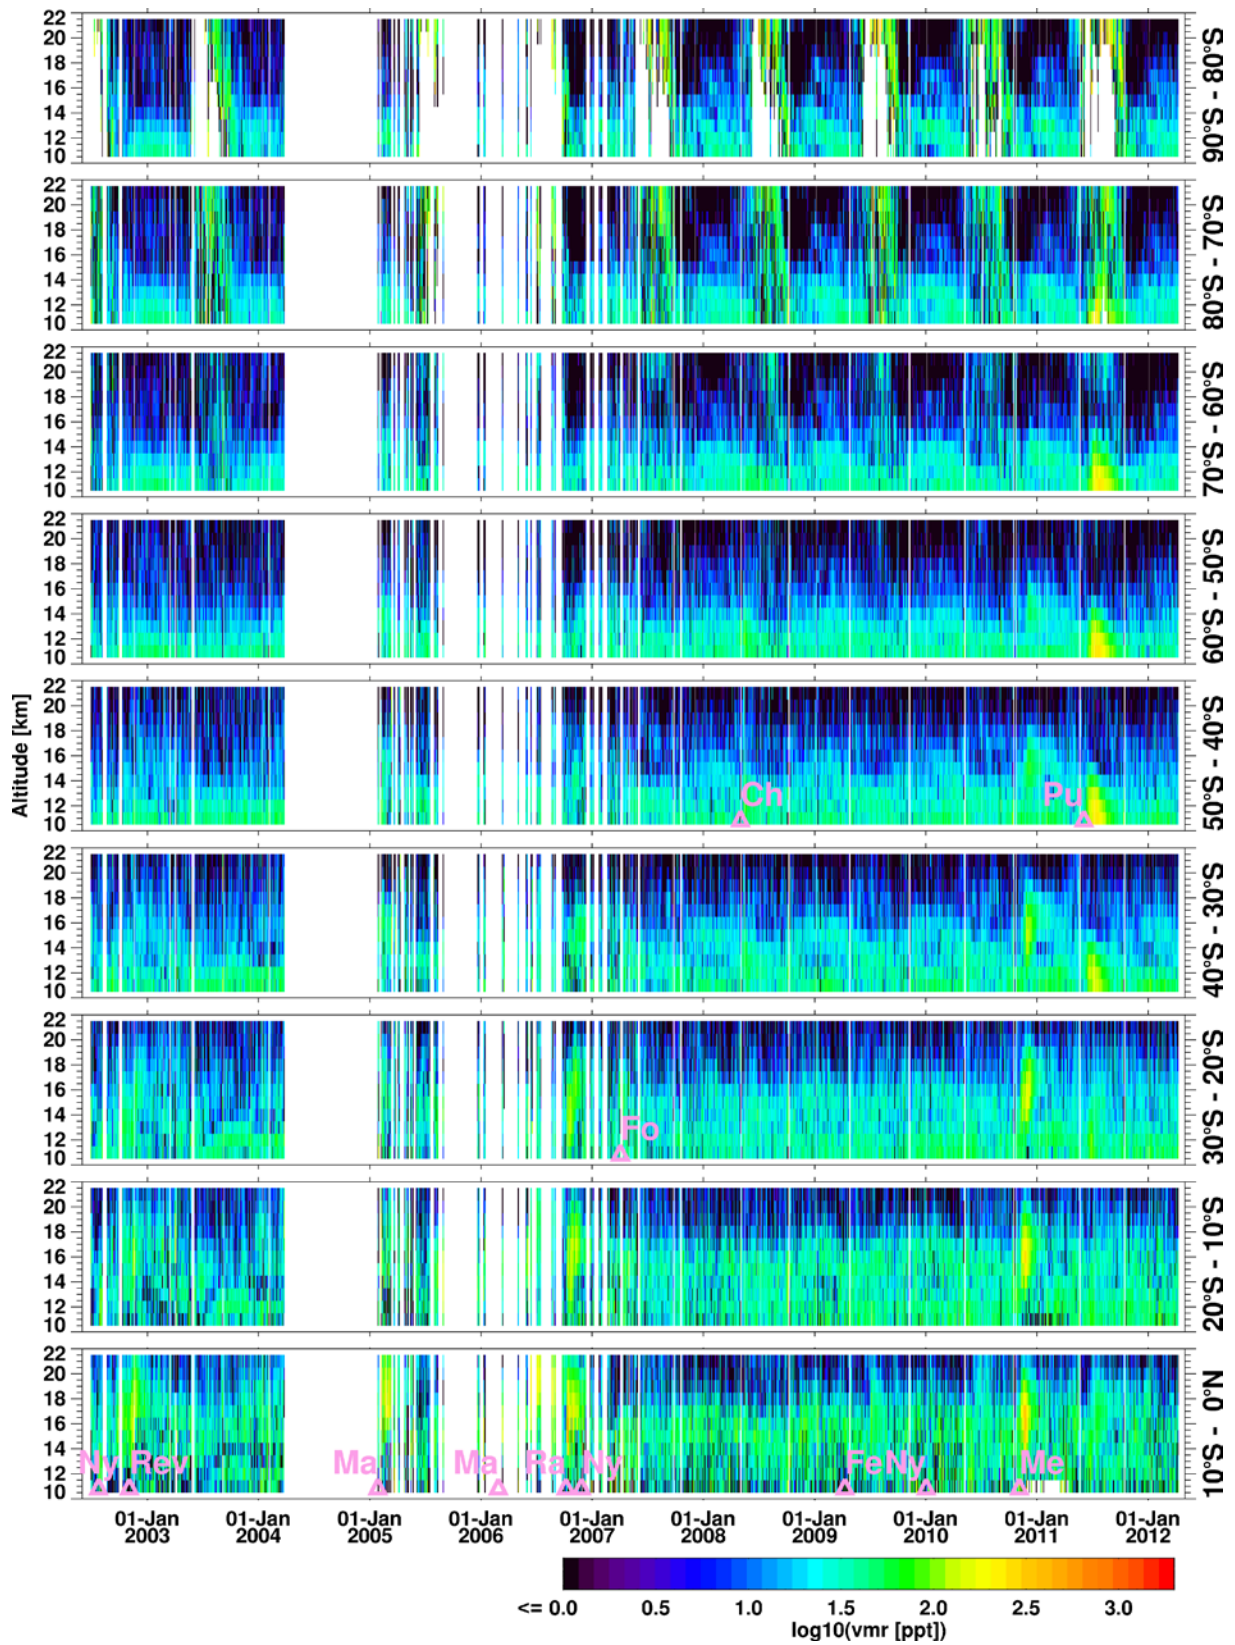

**Fig. 2.** Same as Fig. 11 of the paper but with a logarithmic colour scale.

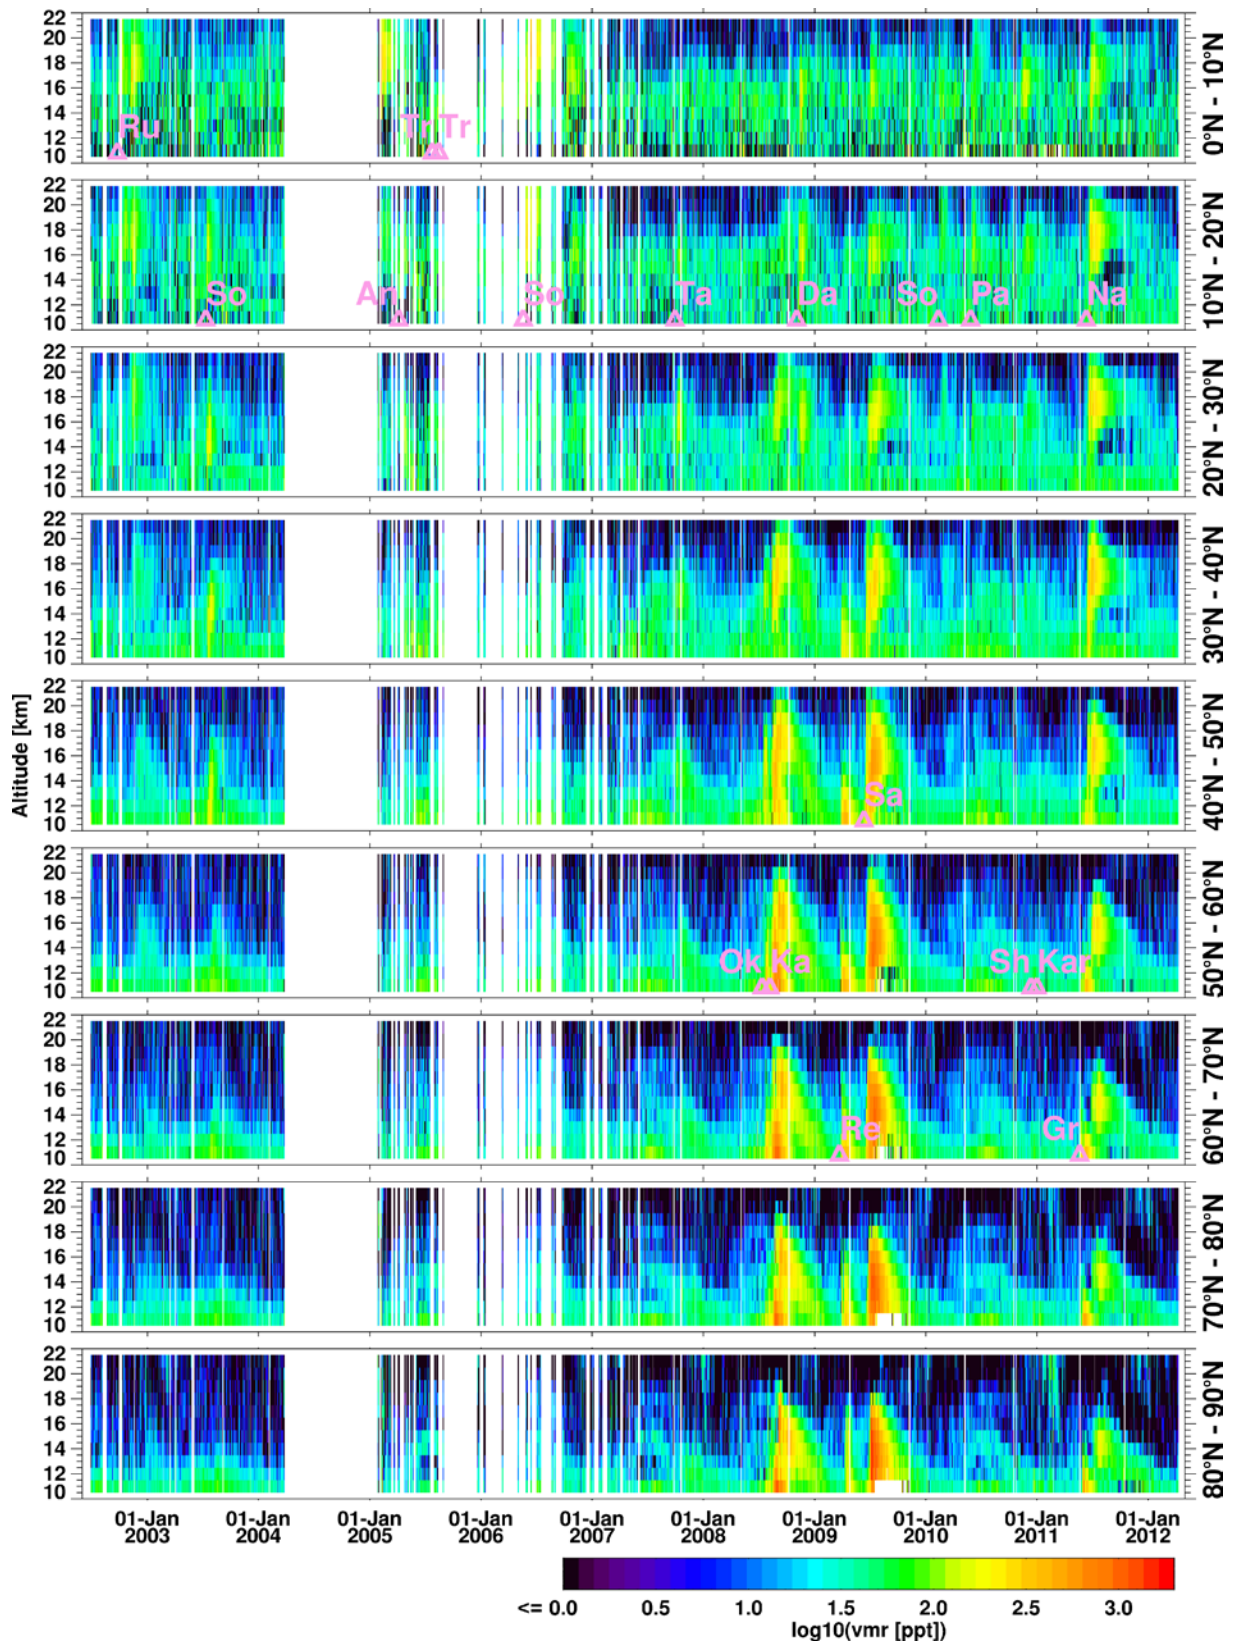

**Fig. 3.** Same as Fig. 11 of the paper but with a logarithmic colour scale.
